# Supplementary material for: Effects of High Cervical Spinal Cord Stimulation on Gait Disturbance and Dysarthropneumophonia in Parkinson’s Disease and Parkinson Variant of Multiple System Atrophy: A Case Series
Source: MDPI journal article supplement (doi:10.3390/brainsci12091222), 2022-09-10
Supplement: s1 [file s1]

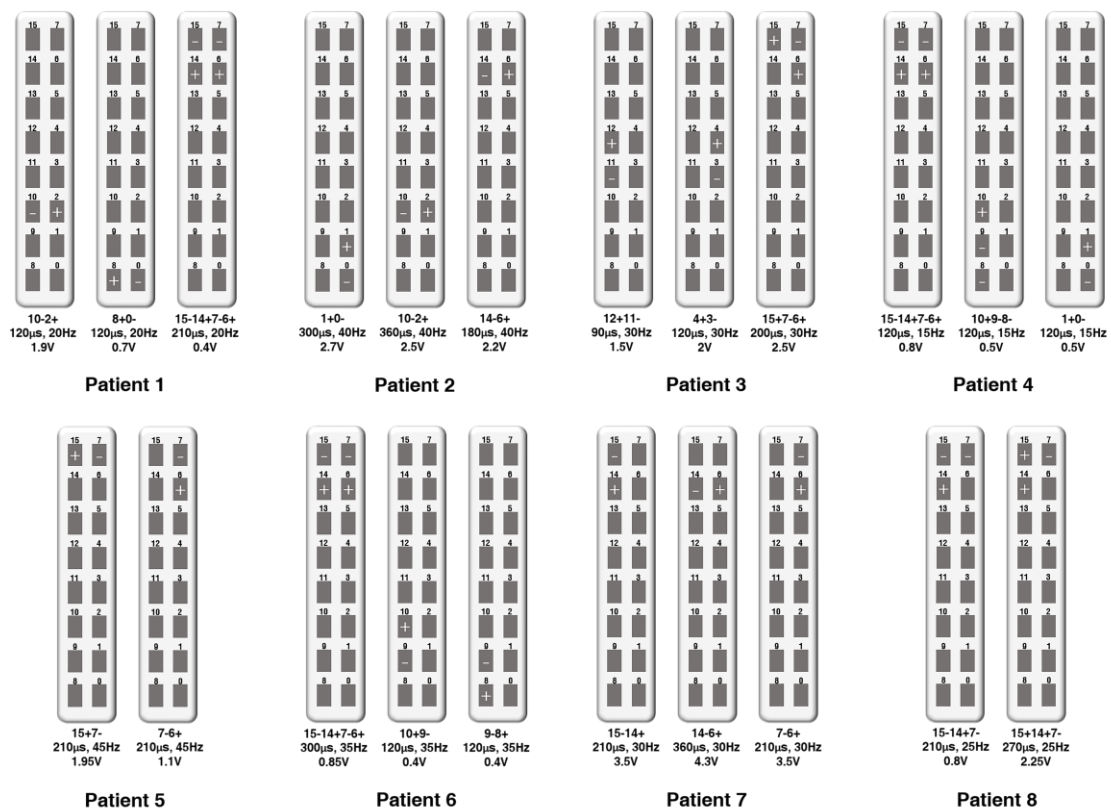

**Supplementary Figure S1.** Detailed simulation parameters in the upright body position determined for each patient at the latest follow-up period.
